# Supplementary material
Source: Springer Nature journal article supplement (https://www.springermedizin.de/resource/supplementary/13012_2012_591_MOESM5_ESM.docx/9630352)
Supplement: MOESM5 [file 9630352]

| **Countries** | **Composite quality score** | | |
| --- | --- | --- | --- |
|  | Achievement % | SD | Practical range |
| Austria | 56,5 | 20,5 | 0-100 |
| Belgium | 59,1 | 19,0 | 0-100 |
| France | 62,3 | 16,5 | 0-100 |
| Germany | 53,5 | 18,4 | 0-100 |
| Netherlands | 44,3 | 24,5 | 0-100 |
| Slovenia | 64,1 | 20,8 | 0-100 |
| Spain | 51,8 | 25,0 | 0-100 |
| Switzerland | 48,4 | 20,8 | 0-100 |
| UK | 58,4 | 21,5 | 0-100 |
| Total | 55,9 | 22,2 | 0-100 |
